# Supplementary material for: What properties characterize the hub proteins of the protein-protein interaction network of Saccharomyces cerevisiae?
Source: Springer Nature journal article supplement (doi:10.1186/gb-2006-7-6-r45), 2006-06-16
Supplement: 13059_2006_1313_MOESM2_ESM.pdf [file 13059_2006_1313_MOESM2_ESM.pdf]

I

| DH      | k   | aPCC | Doms | Domains                   | Rep.doms     | Diso | Int.dom               | Func. |
|---------|-----|------|------|---------------------------|--------------|------|-----------------------|-------|
| YBR160W | 111 | 0.27 | 1    | PF00069                   | No           | 5    | 17 (PF00069)          | R     |
| YNL189W | 61  | 0.26 | 9    | PF01749, PF00514          | 8 (PF00514)  | 37   | 4 (PF00076)           | U     |
| YBR109C | 51  | 0.18 | 4    | PF00036                   | 4 (PF00036)  | 5    | 4 (PF00063)           | T     |
| YDR388W | 50  | 0.25 | 3    | PF00018, PF03114          | No           | 160  | 5 (PF00018)           | U     |
| YBR009C | 42  | 0.31 | 1    | PF00125                   | No           | 28   | 3 (PF00125)           | B     |
| YMR308C | 40  | 0.29 | 11   | PF02985                   | 7 (PF02985)  | 14   | 5 (PF00227)           | YU    |
| YJR022W | 37  | 0.17 | 1    | PF01423                   | No           | 4    | 8 (PF01423)           | A     |
| YIL035C | 36  | 0.30 | 1    | PF00069                   | No           | 30   | 3 (PF00125 PF00270 +) | TDK   |
| YDR328C | 36  | 0.10 | 2    | PF03931, PF01466          | No           | 16   | 10 (PF00646)          | O     |
| YOR181W | 35  | 0.33 | 3    | PF04554, PF02205, PF00568 | No           | 518  | 10 (PF00018)          | TZ    |
| YGR218W | 34  | 0.26 | 9    | PF03810                   | No           | 22   | 3 (PF04096)           | YU    |
| YHR030C | 33  | 0.23 | 2    | PF00069                   | No           | 34   | 6 (PF00069)           | T     |
| YGL137W | 32  | 0.33 | 7    | PF04053, PF00400          | 6 (PF00400)  | 23   | 3 (PF00118 PF00400 +) | U     |
| YER148W | 32  | 0.20 | 2    | PF00352                   | 2 (PF00352)  | 20   | 2 (PF00382 PF04153 +) | K     |
| YEL037C | 31  | 0.23 | 4    | PF00627, PF00240          | 2 (PF00627)  | 72   | 5 (PF00004)           | L     |
| YPL204W | 30  | 0.19 | 3    | PF00069                   | No           | 62   | 2 (PF00149 PF04499 +) | T     |
| YDL140C | 29  | 0.25 | 20   | PF05001, PF04998, PF00623 | 14 (PF05001) | 290  | 2 (PF01096)           | K     |
| YGR040W | 29  | 0.13 | 1    | PF00069                   | No           | 25   | 2 (PF00749 PF00083)   | T     |
| YDR192C | 27  | 0.08 | 2    | PfamB/OP                  | No           | 371  | 4 (PF03810)           | YU    |
| YML064C | 27  | 0.18 | 1    | PF00071                   | No           | 59   | 3 (PF00107)           | R     |
| YHR135C | 27  | 0.18 | 3    | PF00069                   | No           | 68   | 6 (PF00069)           | T     |
| YDL188C | 27  | 0.18 | 2    | PF00149                   | No           | 64   | 13 (PF00227)          | T     |
| YDR167W | 26  | 0.16 | 1    | PF03540                   | No           | 54   | 2 (PF07524 PF00169 +) | K     |
| YLR147C | 26  | 0.26 | 1    | PF01423                   | No           | 23   | 11 (PF01423)          | A     |
| YER133W | 25  | 0.17 | 1    | PF00149                   | No           | 18   | 2 (PF03370 PF00400 +) | TR    |
| YOL004W | 24  | 0.22 | 13   | PF02671                   | 3 (PF02671)  | 223  | 3 (PF00628 PF00172)   | B     |
| YMR125W | 24  | 0.21 | 3    | PF02854                   | No           | 32   | 7 (PF00076)           | A     |

|           |    |      |    |                           |             |     |                       |    |
|-----------|----|------|----|---------------------------|-------------|-----|-----------------------|----|
| YLR347C   | 24 | 0.27 | 10 | PF02985, PF03810          | 6 (PF02985) | 11  | 3 (PF04096)           | YU |
| YML109W   | 24 | 0.28 | 1  | PfamB/OP                  | No          | 59  | 3 (PF00786 PF00169)   | X  |
| YIL061C   | 23 | 0.16 | 3  | PF00076                   | No          | 118 | 3 (PF00270)           | A  |
| YDR477W   | 23 | 0.29 | 4  | PF00069                   | No          | 191 | 4 (PF00069)           | T  |
| YBR198C   | 23 | 0.33 | 9  | PF04494, PF00400          | 6 (PF00400) | 149 | 4 (PF00118)           | K  |
| YJR091C   | 22 | 0.16 | 13 | PF00806, PF00076          | 5 (PF00806) | 155 | 5 (PF00069)           | R  |
| YCR093W   | 22 | 0.13 | 12 | PF04054                   | No          | 29  | 3 (PF04153 PF00400)   | K  |
| YHR165C   | 22 | 0.24 | 15 | PF01398                   | No          | 135 | 3 (PF01423)           | A  |
| YDR448W   | 22 | 0.19 | 4  | PF00569, PF04433, PF00249 | No          | 59  | 2 (PF00439)           | B  |
| YLL039C   | 22 | 0.23 | 5  | PF00240                   | 5 (PF00240) | 2   | 3 (PF00627 PF00069)   | OR |
| YOL051W   | 21 | 0.16 | 1  | PF05397                   | No          | 129 | 1 (PF05000)           |    |
| YGL112C   | 21 | 0.26 | 4  | PF07571, PF02969          | No          | 48  | 2 (PF00439 PF00133)   | K  |
| YGL172W   | 21 | 0.23 | 4  | PfamB/OP                  | No          | 211 | 4 (PF03810)           | YU |
| YIL142W   | 21 | 0.23 | 1  | PF00118                   | No          | 17  | 15 (PF00400)          | O  |
| YPL153C   | 21 | 0.24 | 5  | PF00498, PF00069          | No          | 104 | 1 (PF00056)           | D  |
| YLR438C-A | 21 | 0.01 | 1  | PF01423                   | No          | 11  | 8 (PF01423)           |    |
| YPL031C   | 20 | 0.11 | 1  | PF00069                   | No          | 4   | 8 (PF00134)           | R  |
| YER022W   | 20 | 0.22 | 4  | PfamB/OP                  | No          | 51  | 3 (PF00170)           | X  |
| YMR213W   | 20 | 0.20 | 5  | PF00249                   | 2 (PF00249) | 59  | 3 (PF00270 PF00271 +) | AD |
| YER095W   | 20 | 0.29 | 5  | PF00633                   | No          | 45  | 2 (PF00004)           | L  |
| YER165W   | 20 | 0.32 | 5  | PF00076, PF00658          | 4 (PF00076) | 103 | 2 (PF02854 PF04096)   | AJ |
| YOR098C   | 20 | 0.29 | 9  | PfamB/OP                  | No          | 767 | 5 (PF03810)           | YU |
| YPL240C   | 19 | 0.34 | 2  | PF00183, PF02518          | No          | 35  | 5 (PF00515)           | O  |
| YGL061C   | 19 | 0.21 | 2  | PfamB/OP                  | No          | 64  | 1 (PF01920)           |    |
| YJL041W   | 19 | 0.32 | 6  | PF05064                   | No          | 638 | 2 (PF00636)           | YU |
| YLR452C   | 19 | 0.17 | 3  | PF00615, PF00610          | No          | 79  | 2 (PF05739 PF00069)   |    |
| YGR274C   | 19 | 0.39 | 7  | PF00098                   | No          | 47  | 2 (PF04153 PF04065)   | K  |
| YDL145C   | 19 | 0.31 | 8  | PF06957, PF04053, PF00400 | 6 (PF00400) | 23  | 2 (PF01217 PF01602)   | U  |

|           |    |      |    |                                    |             |     |                       |    |
|-----------|----|------|----|------------------------------------|-------------|-----|-----------------------|----|
| YDR176W   | 19 | 0.21 | 3  | PfamB/OP                           | No          | 70  | 2 (PF00172 PF04082)   | B  |
| YPR086W   | 19 | 0.18 | 3  | PF00382                            | 2 (PF00382) | 30  | 2 (PF00096 PF01399 +) | K  |
| YNL147W   | 19 | 0.29 | 1  | PF01423                            | No          | 20  | 8 (PF01423)           | A  |
| YFL017W-A | 19 | 0.09 | 1  | PF01423                            | No          | 6   | 2 (PF01423 PF00400)   |    |
| YDR099W   | 19 | 0.39 | 1  | PF00244                            | No          | 19  | 2 (PF00786 PF01204 +) | O  |
| YGL120C   | 18 | 0.20 | 4  | PF07717, PF00270, PF00271, PF04408 | No          | 83  | 4 (PF00400)           | A  |
| YGR091W   | 18 | 0.26 | 3  | PF01798                            | No          | 46  | 6 (PF01423)           | A  |
| YDR212W   | 18 | 0.26 | 1  | PF00118                            | No          | 24  | 11 (PF00400)          | O  |
| YLR115W   | 18 | 0.27 | 8  | PfamB/OP                           | No          | 30  | 2 (PF00400)           | A  |
| YOL135C   | 18 | 0.22 | 1  | PF05983                            | No          | 28  | 1 (PF07954)           | K  |
| YBL026W   | 18 | 0.24 | 1  | PF01423                            | No          | 11  | 9 (PF01423)           | A  |
| YDR188W   | 18 | 0.19 | 1  | PF00118                            | No          | 17  | 15 (PF00400)          | O  |
| YJL138C   | 18 | 0.31 | 2  | PF00270, PF00271                   | No          | 13  | 2 (PF02854 PF00271 +) | J  |
| YLR268W   | 18 | 0.33 | 3  | PF00957                            | No          | 21  | 3 (PF05739)           | U  |
| YDR170C   | 17 | 0.20 | 11 | PF01369                            | No          | 89  | 2 (PF04810 PF00626 +) | U  |
| YNL330C   | 17 | 0.28 | 2  | PF00850                            | No          | 38  | 3 (PF00628)           | B  |
| YBR081C   | 17 | 0.29 | 12 | PF07524, PF00439                   | No          | 165 | 1 (PF00096)           | BK |
| YPL042C   | 17 | 0.20 | 1  | PF00069                            | No          | 152 | 2 (PF00172 PF00069)   | K  |
| YPR182W   | 17 | 0.17 | 1  | PF01423                            | No          | 15  | 3 (PF01423)           | A  |
| YGR013W   | 17 | 0.27 | 4  | PfamB/OP                           | No          | 49  | 5 (PF01423)           | A  |
| YIL004C   | 17 | 0.22 | 1  | PF05739                            | No          | 71  | 2 (PF00025 PF04810 +) | U  |
| YJL124C   | 17 | 0.34 | 1  | PF01423                            | No          | 33  | 7 (PF01423)           | A  |
| YBR055C   | 17 | 0.21 | 9  | PF06424                            | No          | 36  | 4 (PF01423)           | A  |
| YKR026C   | 17 | 0.28 | 1  | PF01008                            | No          | 11  | 2 (PF01008 PF00083)   | J  |
| YDL047W   | 17 | 0.34 | 1  | PF00149                            | No          | 18  | 3 (PF04499 PF00118 +) | DT |
| YNL317W   | 17 | 0.36 | 6  | PF00400                            | 5 (PF00400) | 21  | 4 (PF00118)           | A  |
| YPL178W   | 17 | 0.25 | 1  | PF00076                            | No          | 90  | 5 (PF00076)           | A  |
| YPL248C   | 17 | 0.20 | 9  | PF03902, PF04082, PF00172          | No          | 80  | 2 (PF00004)           | X  |

|         |    |      |    |                                    |             |     |                       |     |
|---------|----|------|----|------------------------------------|-------------|-----|-----------------------|-----|
| YPR178W | 17 | 0.18 | 8  | PF00400                            | 7 (PF00400) | 109 | 8 (PF01423)           | A   |
| YER110C | 16 | 0.26 | 13 | PF02985, PF03810                   | 7 (PF02985) | 15  | 2 (PF04096)           | YU  |
| YAL021C | 16 | 0.31 | 7  | PF00560, PF03372                   | 2 (PF00560) | 72  | 2 (PF04153 PF00069)   | K   |
| YDL132W | 16 | 0.34 | 2  | PF00888                            | No          | 35  | 6 (PF00646)           | D   |
| YNR052C | 16 | 0.27 | 2  | PF04857                            | No          | 25  | 3 (PF00069)           | A   |
| YBR253W | 16 | 0.27 | 1  | PfamB/OP                           | No          | 15  | 1 (PF00134)           |     |
| YBR114W | 16 | 0.05 | 5  | PF00097, PF00271, PF00176          | No          | 121 | 1 (PF00350)           | L   |
| YDR335W | 16 | 0.23 | 1  | PfamB/OP                           | No          | 45  | 3 (PF04096)           | YU  |
| YPL235W | 16 | 0.23 | 4  | PF06068                            | No          | 25  | 2 (PF00505)           | K   |
| YKR048C | 16 | 0.07 | 1  | PF00956                            | No          | 86  | 4 (PF00069)           | BD  |
| YAL029C | 16 | 0.07 | 8  | PF01843, PF00063, PF00612, PF02736 | 3 (PF00612) | 39  | 2 (PF02985 PF00036)   | Z   |
| YLR229C | 16 | 0.22 | 1  | PF00071                            | No          | 12  | 5 (PF00786)           | R   |
| YMR139W | 16 | 0.10 | 1  | PF00069                            | No          | 36  | 2 (PF00063 PF01021 +) | G   |
| YOR039W | 16 | 0.14 | 1  | PF01214                            | No          | 37  | 2 (PF01399 PF00076 +) | TDK |
| YGL130W | 15 | 0.23 | 2  | PF01331, PF03919                   | No          | 51  | 2 (PF00012)           | A   |
| YGL190C | 15 | 0.27 | 7  | PF00400                            | 5 (PF00400) | 64  | 5 (PF00118)           | T   |
| YOL090W | 15 | 0.28 | 4  | PF00488, PF05188, PF01624, PF05192 | No          | 19  | 2 (PF01624 PF02518 +) | L   |
| YER171W | 15 | 0.31 | 6  | PF06733, PF06777                   | No          | 52  | 2 (PF00153 PF02985)   | KL  |
| YGL161C | 15 | 0.33 | 2  | PF04893                            | No          | 40  | 10 (PF00071)          | S   |
| YGL092W | 15 | 0.32 | 9  | PF04096                            | No          | 450 | 2 (PF02985 PF03810 +) | YU  |
| YGR092W | 15 | 0.32 | 3  | PF00433, PF00069                   | No          | 175 | 3 (PF00069)           | R   |
| YKR002W | 15 | 0.31 | 2  | PF04926, PF04928                   | No          | 40  | 1 (PF03178)           | A   |
| YLR362W | 15 | 0.30 | 4  | PF07647, PF00069                   | No          | 216 | 4 (PF00069)           | T   |
| YOR212W | 15 | 0.26 | 7  | PF00400                            | 7 (PF00400) | 6   | 5 (PF00118)           | R   |
| YJR064W | 15 | 0.20 | 1  | PF00118                            | No          | 30  | 10 (PF00400)          | O   |
| YBR126C | 15 | 0.27 | 1  | PF00982                            | No          | 18  | 3 (PF02358 PF00982)   | G   |
| YGL198W | 15 | 0.27 | 1  | PF04893                            | No          | 33  | 10 (PF00071)          | S   |
| YBR079C | 15 | 0.32 | 6  | PF01399                            | No          | 83  | 2 (PF00076)           | J   |

|         |    |      |    |                                    |             |     |                       |    |
|---------|----|------|----|------------------------------------|-------------|-----|-----------------------|----|
| YBR200W | 14 | 0.19 | 4  | PF00018, PF00787, PF00564          | 2 (PF00018) | 76  | 2 (PF07647 PF00018 +) | C  |
| YPL140C | 14 | 0.29 | 3  | PF00069                            | No          | 210 | 2 (PF00180 PF00069)   | T  |
| YHR041C | 14 | 0.16 | 2  | PfamB/OP                           | No          | 16  | 2 (PF00400)           |    |
| YKR001C | 14 | 0.23 | 3  | PF02212, PF01031, PF00350          | No          | 79  | 4 (PF00176 PF00271)   | UR |
| YMR061W | 14 | 0.31 | 4  | PF05843                            | No          | 46  | 3 (PF00076)           | A  |
| YNL263C | 14 | 0.35 | 1  | PF03878                            | No          | 50  | 11 (PF00071)          | S  |
| YJL014W | 14 | 0.22 | 1  | PF00118                            | No          | 6   | 12 (PF00400)          | O  |
| YGL115W | 14 | 0.25 | 4  | PF00571                            | 4 (PF00571) | 18  | 8 (PF00069)           | C  |
| YCR077C | 14 | 0.35 | 5  | PfamB/OP                           | No          | 249 | 8 (PF01423)           | S  |
| YER081W | 13 | 0.14 | 3  | PF02826, PF01842, PF00389          | No          | 27  | 2 (PF00107 PF02826 +) | E  |
| YHR061C | 13 | 0.27 | 3  | PF00786                            | No          | 52  | 2 (PF00786)           |    |
| YLR191W | 13 | 0.32 | 3  | PF00018, PF04088                   | No          | 71  | 2 (PF04757)           | U  |
| YMR001C | 13 | 0.31 | 4  | PF00659, PF00069                   | 2 (PF00659) | 164 | 2 (PF06470 PF02463 +) | D  |
| YPL151C | 13 | 0.22 | 8  | PF00400                            | 7 (PF00400) | 32  | 2 (PF01423 PF00118)   | A  |
| YDL002C | 13 | 0.20 | 1  | PF00505                            | No          | 56  | 3 (PF00176 PF00271)   | R  |
| YMR012W | 13 | 0.26 | 8  | PfamB/OP                           | No          | 58  | 1 (PF06733)           | R  |
| YAL043C | 13 | 0.39 | 6  | PfamB/OP                           | No          | 80  | 2 (PF00400)           | A  |
| YBR103W | 13 | 0.22 | 7  | PF00400                            | 5 (PF00400) | 2   | 1 (PF02146)           | B  |
| YDR443C | 13 | 0.17 | 14 | PfamB/OP                           | No          | 66  | 1 (PF00560)           |    |
| YJR093C | 13 | 0.17 | 2  | PF05182                            | No          | 29  | 1 (PF03178)           | A  |
| YNL244C | 13 | 0.16 | 1  | PF01253                            | No          | 4   | 3 (PF01399)           | J  |
| YBL105C | 13 | 0.21 | 10 | PF02185, PF00433, PF00168, PF00069 | 3 (PF00130) | 290 | 2 (PF00069)           | T  |
| YBR135W | 13 | 0.13 | 1  | PF01111                            | No          | 3   | 7 (PF00134)           | D  |
| YDL185W | 13 | 0.31 | 6  | PF02874, PF00306, PF05203          | No          | 17  | 2 (PF01496)           | C  |
| YLR275W | 13 | 0.20 | 1  | PF01423                            | No          | 24  | 9 (PF01423)           | A  |
| YNL025C | 13 | 0.26 | 2  | PF00134                            | No          | 28  | 4 (PF00069)           | K  |
| YHR086W | 13 | 0.09 | 4  | PF00076                            | 3 (PF00076) | 126 | 3 (PF00076)           | R  |
| YKL166C | 13 | 0.05 | 1  | PF00069                            | No          | 86  | 4 (PF00069)           | T  |

|         |    |      |    |                           |             |     |                       |     |
|---------|----|------|----|---------------------------|-------------|-----|-----------------------|-----|
| YMR186W | 13 | 0.29 | 2  | PF00183, PF02518          | No          | 33  | 4 (PF00515)           | O   |
| YDL017W | 13 | 0.22 | 1  | PF00069                   | No          | 27  | 3 (PF02776 PF00205)   | L   |
| YHR027C | 13 | 0.29 | 12 | PF01851                   | 6 (PF01851) | 43  | 5 (PF00069)           | O   |
| YLR117C | 13 | 0.18 | 10 | PF02184                   | 7 (PF02184) | 19  | 2 (PF00270 PF00271 +) | D   |
| YDR228C | 13 | 0.34 | 5  | PfamB/OP                  | No          | 27  | 2 (PF00076)           | A   |
| YNL298W | 13 | 0.29 | 7  | PF00786, PF00169, PF00069 | No          | 160 | 2 (PF00620 PF00018 +) | T   |
| YOR308C | 13 | 0.28 | 1  | PF03343                   | No          | 72  | 4 (PF01423)           | A   |
| YCR009C | 13 | 0.31 | 1  | PF03114                   | No          | 21  | 2 (PF04554)           | U   |
| YDR309C | 13 | 0.23 | 3  | PF00786                   | No          | 54  | 2 (PF00786)           |     |
| YDL160C | 12 | 0.11 | 3  | PF00270, PF00271          | No          | 83  | 3 (PF01423)           | A   |
| YLR180W | 12 | 0.32 | 3  | PF02772, PF02773, PF00438 | No          | 2   | 1 (PF01502)           | H   |
| YDR311W | 12 | 0.17 | 6  | PF03909                   | 2 (PF03909) | 38  | 1 (PF00096)           | KL  |
| YEL051W | 12 | 0.35 | 1  | PF01813                   | No          | 44  | 2 (PF01496 PF01008)   | C   |
| YNL271C | 12 | 0.27 | 9  | PF02181, PF06367, PF06371 | No          | 163 | 2 (PF00018 PF00071 +) | TZ  |
| YDL042C | 12 | 0.23 | 2  | PF04574, PF02146          | No          | 61  | 1 (PF00332)           | BK  |
| YDR172W | 12 | 0.21 | 7  | PF03143, PF03144, PF00009 | No          | 256 | 3 (PF00076)           | J   |
| YPR072W | 12 | 0.20 | 4  | PF04065, PF04153          | No          | 137 | 2 (PF04153)           | K   |
| YDL043C | 12 | 0.30 | 2  | PF06220                   | No          | 47  | 3 (PF00076 PF00400)   | A   |
| YOL123W | 12 | 0.27 | 5  | PF00076                   | 2 (PF00076) | 195 | 2 (PF04096)           | A   |
| YBR254C | 12 | 0.24 | 1  | PF04628                   | No          | 11  | 3 (PF04051)           | U   |
| YFR034C | 12 | 0.16 | 2  | PF00010                   | No          | 129 | 3 (PF00004)           |     |
| YGR074W | 12 | 0.34 | 1  | PF01423                   | No          | 38  | 2 (PF01423)           | A   |
| YBR175W | 12 | 0.35 | 5  | PF00400                   | 5 (PF00400) | 0   | 2 (PF00270 PF00271 +) | R   |
| YDL165W | 12 | 0.36 | 1  | PF04153                   | No          | 9   | 1 (PF00569)           | KDR |
| YKL095W | 12 | 0.18 | 1  | PF04502                   | No          | 41  | 2 (PF00118 PF00400)   | S   |
| YGL116W | 12 | 0.21 | 9  | PF00400                   | 5 (PF00400) | 239 | 4 (PF00118)           | DO  |
| YPL256C | 12 | 0.23 | 3  | PF00134                   | No          | 37  | 2 (PF00023 PF00069)   | D   |
| YBR217W | 12 | 0.23 | 1  | PF04110                   | No          | 44  | 3 (PF00004)           | O   |

|         |    |      |   |                  |             |     |                       |    |
|---------|----|------|---|------------------|-------------|-----|-----------------------|----|
| YDR227W | 12 | 0.32 | 8 | PfamB/OP         | No          | 48  | 2 (PF00125)           |    |
| YLR447C | 12 | 0.20 | 1 | PF01992          | No          | 5   | 3 (PF00069 PF00106)   | C  |
| YDR378C | 12 | 0.35 | 1 | PF01423          | No          | 16  | 9 (PF01423)           | A  |
| YFL038C | 12 | 0.29 | 1 | PF00071          | No          | 36  | 3 (PF04893)           | TU |
| YOL149W | 12 | 0.34 | 1 | PF06058          | No          | 35  | 7 (PF01423)           | KA |
| YFR021W | 11 | 0.19 | 4 | PfamB/OP         | No          | 15  | 1 (PF00010)           | S  |
| YFR051C | 11 | 0.35 | 3 | PF00928, PF01217 | No          | 122 | 2 (PF04053 PF01602 +) | U  |
| YOR361C | 11 | 0.30 | 5 | PF00076          | No          | 44  | 2 (PF01399 PF00400)   | J  |
| YBL002W | 11 | 0.24 | 1 | PF00125          | No          | 42  | 5 (PF00176 PF00271)   | B  |
| YDR142C | 11 | 0.38 | 6 | PF00400          | 6 (PF00400) | 4   | 4 (PF00118)           | U  |
| YGR172C | 11 | 0.15 | 1 | PF04893          | No          | 57  | 2 (PF00071 PF04893)   | U  |
| YHR152W | 11 | 0.22 | 2 | PF05032          | No          | 42  | 1 (PF01063)           | X  |
| YLR342W | 11 | 0.27 | 9 | PF02364          | No          | 145 | 1 (PF04051)           | M  |
| YLR442C | 11 | 0.19 | 7 | PF01426          | No          | 270 | 4 (PF00125)           | L  |
| YOR332W | 11 | 0.23 | 1 | PF01991          | No          | 22  | 2 (PF01496 PF00069)   | C  |
| YBL023C | 11 | 0.39 | 4 | PF00493          | No          | 70  | 2 (PF00493)           | L  |
| YDR523C | 11 | 0.16 | 3 | PF00069          | No          | 142 | 2 (PF00149)           | T  |
| YGL003C | 11 | 0.19 | 9 | PF00400          | 5 (PF00400) | 201 | 3 (PF00069)           | DO |
| YMR273C | 11 | 0.21 | 1 | PfamB/OP         | No          | 158 | 2 (PF00786 PF02985)   | X  |
| YOL133W | 11 | 0.32 | 1 | PF00097          | No          | 40  | 4 (PF00888)           | O  |
| YBR274W | 11 | 0.40 | 3 | PF00069          | No          | 88  | 1 (PF00096)           | D  |
| YIL094C | 11 | 0.21 | 1 | PF00180          | No          | 17  | 2 (PF00069)           | E  |
| YKL104C | 11 | 0.17 | 4 | PF01380, PF00310 | 2 (PF01380) | 0   | 3 (PF00069)           | M  |
| YMR304W | 11 | 0.12 | 7 | PF00443, PF00917 | No          | 39  | 4 (PF00069)           | O  |
| YAL005C | 11 | 0.25 | 1 | PF00012          | No          | 47  | 2 (PF03810 PF00226 +) | O  |
| YDR195W | 11 | 0.27 | 5 | PfamB/OP         | No          | 62  | 2 (PF00400)           |    |
| YBL016W | 11 | 0.36 | 1 | PF00069          | No          | 2   | 2 (PF00069)           | T  |
| YDL116W | 11 | 0.26 | 1 | PF04121          | No          | 18  | 3 (PF04096)           | YU |

$\infty$ 

|           |    |      |    |                           |             |     |                       |    |
|-----------|----|------|----|---------------------------|-------------|-----|-----------------------|----|
| YDR507C   | 11 | 0.24 | 7  | PF05672, PF00069          | No          | 226 | 5 (PF00735)           | D  |
| YFR037C   | 11 | 0.28 | 5  | PF00569, PF04433, PF00249 | No          | 72  | 3 (PF00176 PF00271)   | B  |
| YHL007C   | 11 | 0.33 | 7  | PF00786, PF00069          | No          | 206 | 3 (PF00018)           | T  |
| YJL187C   | 11 | 0.18 | 5  | PF00069                   | No          | 364 | 2 (PF00564 PF00400 +) | D  |
| YOL108C   | 11 | 0.10 | 1  | PfamB/OP                  | No          | 41  | 5 (PF00010)           |    |
| YBR089C-A | 11 | 0.03 | 1  | PF00505                   | No          | 32  | 4 (PF00176 PF00271)   |    |
| YEL009C   | 11 | 0.06 | 2  | PfamB/OP                  | No          | 43  | 1 (PF00569)           | K  |
| YPR119W   | 11 | 0.20 | 3  | PF00134, PF02984          | No          | 211 | 2 (PF00400 PF00069)   | D  |
| YML010W   | 10 | 0.28 | 13 | PF03439, PF00467          | 5 (PF00467) | 236 | 1 (PF02020)           | K  |
| YAL041W   | 10 | 0.25 | 6  | PF06395, PF00621, PF00564 | No          | 59  | 2 (PF00069 PF00071)   | T  |
| YBR011C   | 10 | 0.28 | 1  | PF00719                   | No          | 21  | 3 (PF00069)           | C  |
| YDL101C   | 10 | 0.16 | 2  | PF00498, PF00069          | No          | 92  | 2 (PF00069)           | D  |
| YJL081C   | 10 | 0.31 | 1  | PF00022                   | No          | 12  | 4 (PF00125)           | Z  |
| YLL021W   | 10 | 0.32 | 8  | PfamB/OP                  | No          | 630 | 5 (PF00069)           | X  |
| YMR201C   | 10 | 0.10 | 4  | PF05181, PF01286          | No          | 37  | 1 (PF06733)           | L  |
| YDL192W   | 10 | 0.28 | 1  | PF00025                   | No          | 3   | 1 (PF00025)           | U  |
| YER172C   | 10 | 0.22 | 13 | PF00270, PF00271, PF02889 | No          | 100 | 3 (PF01423)           | A  |
| YGR252W   | 10 | 0.31 | 4  | PF00439, PF00583          | No          | 73  | 1 (PF00096)           | BK |
| YLR423C   | 10 | 0.11 | 1  | PF04108                   | No          | 16  | 3 (PF00071)           | X  |
| YNL093W   | 10 | 0.32 | 1  | PF00071                   | No          | 40  | 3 (PF00069)           | U  |
| YNL243W   | 10 | 0.27 | 6  | PF07651, PF01608          | No          | 80  | 2 (PF00018)           | Z  |
| YCR084C   | 10 | 0.19 | 10 | PF00400                   | 7 (PF00400) | 97  | 2 (PF00125)           | R  |
| YDR404C   | 10 | 0.17 | 2  | PF00575, PF03876          | No          | 0   | 1 (PF01193)           | K  |
| YGR104C   | 10 | 0.28 | 3  | PfamB/OP                  | No          | 28  | 1 (PF00134)           |    |
| YJL194W   | 10 | 0.21 | 3  | PF00004                   | No          | 67  | 2 (PF00004)           | LD |
| YER125W   | 10 | 0.24 | 6  | PF00168, PF00397, PF00632 | 3 (PF00397) | 111 | 2 (PF04425 PF02752 +) | O  |
| YJL095W   | 10 | 0.31 | 6  | PF00069                   | No          | 190 | 4 (PF00069)           | T  |
| YML065W   | 10 | 0.29 | 7  | PF00004, PF01426          | No          | 148 | 1 (PF05460)           | L  |



|         |    |      |    |                                    |             |     |                       |     |
|---------|----|------|----|------------------------------------|-------------|-----|-----------------------|-----|
| YDR216W | 10 | 0.03 | 13 | PF00096                            | 2 (PF00096) | 145 | 2 (PF00400)           | R   |
| YDR416W | 10 | 0.19 | 7  | PfamB/OP                           | No          | 18  | 1 (PF06246)           | A   |
| YJR066W | 10 | 0.19 | 20 | PF00454, PF02260, PF02259, PF02985 | 4 (PF02985) | 43  | 4 (PF00320)           | L   |
| YKR036C | 10 | 0.32 | 8  | PF00400                            | 5 (PF00400) | 42  | 5 (PF00118)           | R   |
| YLL026W | 10 | 0.11 | 9  | PF07724, PF00004, PF02861          | 2 (PF02861) | 36  | 3 (PF00515)           | O   |
| YLR096W | 10 | 0.26 | 6  | PF02149, PF00069                   | No          | 111 | 2 (PF00018 PF07646 +) | T   |
| YNL006W | 10 | 0.24 | 6  | PF00400                            | 6 (PF00400) | 0   | 3 (PF02985)           | R   |
| YOR106W | 10 | 0.28 | 2  | PF00804, PF05739                   | No          | 127 | 2 (PF00957 PF01602)   | U   |
| YAR007C | 10 | 0.32 | 4  | PF01336, PF04057                   | No          | 76  | 2 (PF00270)           | L   |
| YGL207W | 10 | 0.29 | 6  | PF00557                            | No          | 84  | 3 (PF00069)           | E   |
| YNL288W | 10 | 0.30 | 2  | PF04078                            | No          | 52  | 3 (PF04153)           | R   |
| YBR279W | 10 | 0.31 | 1  | PF03985                            | No          | 84  | 1 (PF05000)           | K   |
| YPL129W | 10 | 0.32 | 2  | PF03366                            | No          | 40  | 1 (PF00096)           | K   |
| YDR240C | 9  | 0.26 | 4  | PfamB/OP                           | No          | 77  | 4 (PF00076)           |     |
| YGL240W | 9  | 0.39 | 1  | PF03256                            | No          | 3   | 3 (PF00515)           | DO  |
| YLR310C | 9  | 0.14 | 10 | PF00618, PF00018, PF00617          | No          | 129 | 3 (PF00012)           | T   |
| YNL161W | 9  | 0.36 | 5  | PF00433, PF00069                   | No          | 96  | 2 (PF03637)           | R   |
| YOR061W | 9  | 0.29 | 1  | PF00069                            | No          | 42  | 2 (PF01214 PF00069)   | TDK |
| YPL161C | 9  | 0.33 | 6  | PfamB/OP                           | No          | 28  | 5 (PF00071)           |     |
| YPL181W | 9  | 0.25 | 2  | PF00628                            | No          | 347 | 2 (PB098478)          | R   |
| YAL032C | 9  | 0.16 | 2  | PF02731                            | No          | 68  | 2 (PF00400)           | AB  |
| YDR432W | 9  | 0.08 | 4  | PF00076                            | 2 (PF00076) | 118 | 5 (PF00076)           | A   |
| YBL093C | 9  | 0.22 | 2  | PfamB/OP                           | No          | 47  | 2 (PF06017 PF00063 +) | X   |
| YHR023W | 9  | 0.26 | 9  | PF00063, PF00038                   | No          | 296 | 2 (PF00063 PF01843 +) | Z   |
| YMR043W | 9  | 0.18 | 3  | PF00319                            | No          | 41  | 1 (PF00498)           | K   |
| YLR044C | 9  | 0.15 | 5  | PF00205, PF02776                   | No          | 6   | 2 (PF00176 PF00271)   | EH  |
| YMR054W | 9  | 0.30 | 1  | PF01496                            | No          | 60  | 2 (PF02874 PF00306)   | C   |
| YJL115W | 9  | 0.23 | 2  | PF04729                            | No          | 54  | 2 (PF00268)           | KB  |

|         |   |      |    |                                    |             |     |                       |      |
|---------|---|------|----|------------------------------------|-------------|-----|-----------------------|------|
| YLR015W | 9 | 0.21 | 3  | PfamB/OP                           | No          | 31  | 3 (PF00400)           | BK   |
| YIL046W | 9 | 0.16 | 9  | PF00646, PF00400                   | 7 (PF00400) | 142 | 2 (PF00240)           | R    |
| YNL127W | 9 | 0.26 | 7  | PF07923                            | No          | 35  | 1 (PF01426)           | S    |
| YNR017W | 9 | 0.22 | 1  | PF02466                            | No          | 47  | 4 (PF02953)           | U    |
| YDR238C | 9 | 0.36 | 3  | PF01602, PF07718                   | No          | 38  | 2 (PF04053 PF00400)   | U    |
| YDR468C | 9 | 0.32 | 2  | PF05739                            | No          | 83  | 1 (PF02071)           | U    |
| YIL038C | 9 | 0.29 | 5  | PF04065, PF04153                   | No          | 393 | 1 (PF02776)           | K    |
| YKR068C | 9 | 0.24 | 1  | PF04051                            | No          | 19  | 2 (PF04051 PF04099)   | U    |
| YLR288C | 9 | 0.29 | 4  | PfamB/OP                           | No          | 27  | 2 (PF00153)           |      |
| YLR418C | 9 | 0.30 | 2  | PF05179                            | No          | 33  | 1 (PF00382)           | K    |
| YBR119W | 9 | 0.26 | 3  | PF00076                            | No          | 82  | 2 (PF00076)           | R    |
| YBR289W | 9 | 0.32 | 6  | PF04855                            | No          | 37  | 1 (PF07569)           | BK   |
| YGR009C | 9 | 0.24 | 5  | PF05739                            | No          | 139 | 3 (PF00957)           | U    |
| YHR099W | 9 | 0.18 | 15 | PF00454, PF02260, PF02259          | No          | 52  | 2 (PF00439)           | TBLD |
| YKL139W | 9 | 0.13 | 2  | PF00069                            | No          | 181 | 3 (PF00076)           | D    |
| YLR319C | 9 | 0.23 | 3  | PF03915                            | No          | 129 | 2 (PF02181 PF06371 +) |      |
| YMR199W | 9 | 0.28 | 3  | PF00134                            | No          | 45  | 2 (PF00069)           | D    |
| YOR089C | 9 | 0.19 | 1  | PF00071                            | No          | 38  | 3 (PF00071)           | U    |
| YER120W | 8 | 0.23 | 2  | PF00635                            | No          | 93  | 3 (PF00169)           | U    |
| YGL100W | 8 | 0.26 | 5  | PF00400                            | 5 (PF00400) | 6   | 3 (PF00400)           | YU   |
| YJR090C | 8 | 0.37 | 11 | PF00646                            | No          | 51  | 2 (PF00134 PF02776 +) | R    |
| YOR290C | 8 | 0.28 | 14 | PF00439, PF00271, PF00176, PF02178 | 2 (PF02178) | 169 | 2 (PF00249 PF04433)   | BK   |
| YBR221C | 8 | 0.27 | 2  | PF02780, PF02779                   | No          | 15  | 3 (PF00364)           | C    |
| YER031C | 8 | 0.39 | 1  | PF00071                            | No          | 45  | 3 (PF04893)           | U    |
| YJL061W | 8 | 0.37 | 6  | PfamB/OP                           | No          | 41  | 2 (PF03177)           |      |
| YJL141C | 8 | 0.24 | 5  | PF00069                            | No          | 263 | 2 (PF00350 PF05652 +) | R    |
| YKL081W | 8 | 0.29 | 3  | PF00647, PF00043, PF02798          | No          | 48  | 3 (PF00400)           | J    |
| YML001W | 8 | 0.34 | 1  | PF00071                            | No          | 35  | 2 (PF04893)           | R    |

|         |   |      |    |                                    |              |     |                       |    |
|---------|---|------|----|------------------------------------|--------------|-----|-----------------------|----|
| YIL112W | 8 | 0.29 | 10 | PF00023                            | 4 (PF00023)  | 221 | 1 (PF02146)           | R  |
| YJR042W | 8 | 0.39 | 1  | PF07575                            | No           | 17  | 2 (PF00400 PF04096)   | YU |
| YPL082C | 8 | 0.21 | 17 | PF00271, PF02985, PF00176          | 6 (PF02985)  | 114 | 1 (PF00350)           | K  |
| YBR193C | 8 | 0.18 | 1  | PfamB/OP                           | No           | 20  | 1 (PF00627)           | X  |
| YCR033W | 8 | 0.22 | 11 | PF03990, PF00249                   | 2 (PF00249)  | 52  | 1 (PF02146)           | K  |
| YDR283C | 8 | 0.17 | 11 | PF05773, PF00069                   | No           | 101 | 2 (PF02518 PF00183 +) | J  |
| YDR473C | 8 | 0.21 | 4  | PfamB/OP                           | No           | 41  | 4 (PF01423)           | A  |
| YER173W | 8 | 0.25 | 1  | PF03215                            | No           | 64  | 2 (PF00004)           | DL |
| YKL203C | 8 | 0.20 | 20 | PF00454, PF02260, PF02259, PF02985 | 4 (PF02985)  | 46  | 1 (PF00618)           | L  |
| YGR134W | 8 | 0.20 | 11 | PfamB/OP                           | No           | 38  | 2 (PF04153 PF04065)   |    |
| YJL164C | 8 | 0.29 | 1  | PF00069                            | No           | 85  | 3 (PF00069)           | T  |
| YOR244W | 8 | 0.19 | 3  | PF01853                            | No           | 86  | 2 (PF00022)           | B  |
| YOR304W | 8 | 0.24 | 6  | PF00271, PF00176                   | No           | 87  | 2 (PF00505 PF00176 +) | K  |
| YPL004C | 8 | 0.35 | 3  | PfamB/OP                           | No           | 28  | 4 (PF00069)           | X  |
| YPR054W | 8 | 0.26 | 1  | PF00069                            | No           | 35  | 2 (PF00069)           | T  |
| YDL005C | 8 | 0.20 | 4  | PfamB/OP                           | No           | 93  | 1 (PF01399)           |    |
| YDR155C | 8 | 0.13 | 1  | PF00160                            | No           | 15  | 1 (PF02146)           | O  |
| YER155C | 8 | 0.24 | 18 | PF00618, PF00620, PF00169, PF00617 | No           | 192 | 1 (PF00448)           | T  |
| YML085C | 8 | 0.28 | 2  | PF00091, PF03953                   | No           | 17  | 3 (PF01302)           | Z  |
| YNL135C | 8 | 0.21 | 1  | PF00254                            | No           | 1   | 1 (PF00096)           | O  |
| YAL016W | 8 | 0.30 | 12 | PF02985                            | 12 (PF02985) | 15  | 2 (PF00149)           | T  |
| YBL106C | 8 | 0.16 | 2  | PfamB/OP                           | No           | 48  | 1 (PF02809)           | U  |
| YDL126C | 8 | 0.34 | 6  | PF00004, PF02359                   | 2 (PF00004)  | 44  | 1 (PF00312)           | O  |
| YGR086C | 8 | 0.29 | 1  | PfamB/OP                           | No           | 64  | 5 (PF00069)           | X  |
| YMR236W | 8 | 0.07 | 1  | PF02291                            | No           | 33  | 1 (PF00569)           | K  |
| YOL086C | 8 | 0.15 | 1  | PF00107                            | No           | 1   | 3 (PF00176 PF00271)   | Q  |
| YOR076C | 8 | 0.33 | 6  | PF00009                            | No           | 129 | 2 (PF00270)           | J  |
| YDR207C | 8 | 0.34 | 8  | PF00172                            | No           | 130 | 2 (PF00069)           |    |

|         |    |      |      |                           |             |      |                       |       |
|---------|----|------|------|---------------------------|-------------|------|-----------------------|-------|
| YLR337C | 8  | 0.40 | 5    | PF02205                   | 2 (PF02205) | 386  | 4 (PF00018)           | Z     |
| YML007W | 8  | 0.29 | 6    | PF00170                   | No          | 143  | 2 (PF02985 PF03810)   | X     |
| YPR107C | 8  | 0.40 | 4    | PF00642                   | 4 (PF00642) | 39   | 2 (PF00400)           | A     |
| YER068W | 8  | 0.36 | 7    | PF00097, PF00076, PF00642 | No          | 155  | 3 (PF04153)           | K     |
| YFR028C | 8  | 0.29 | 5    | PF00782                   | No          | 61   | 1 (PF02146)           | V     |
| YHR158C | 8  | 0.33 | 11   | PF01344, PF07646, PF07195 | 4 (PF01344) | 190  | 3 (PF00069)           | R     |
| YJL128C | 8  | 0.30 | 2    | PF00069                   | No          | 297  | 4 (PF00069)           | T     |
| YOL038W | 8  | 0.30 | 1    | PF00227                   | No          | 19   | 3 (PF00227)           | O     |
| YOL068C | 8  | 0.22 | 2    | PF04574, PF02146          | No          | 37   | 1 (PF00023)           | BK    |
| YOL148C | 8  | 0.32 | 5    | PfamB/OP                  | No          | 87   | 1 (PF00569)           | BK    |
| YPL218W | 8  | 0.33 | 1    | PF00025                   | No          | 2    | 1 (PF00957)           | U     |
| PH      | k  | aPCC | Doms | Domains                   | Rep.doms    | Diso | Int.dom               | Func. |
| YCR057C | 51 | 0.67 | 13   | PF00400, PF04047          | 7 (PF00400) | 72   | 10 (PF00400)          | A     |
| YMR047C | 41 | 0.35 | 10   | PF04096                   | No          | 951  | 6 (PF03810)           | YU    |
| YDR394W | 36 | 0.43 | 3    | PF00004                   | No          | 23   | 5 (PF01399 PF00004)   | O     |
| YFL039C | 34 | 0.36 | 1    | PF00022                   | No          | 5    | 3 (PF00018 PF00307 +) | Z     |
| YPL043W | 33 | 0.69 | 5    | PF00076                   | 4 (PF00076) | 53   | 4 (PF00270 PF00271)   | A     |
| YER012W | 32 | 0.66 | 1    | PF00227                   | No          | 3    | 12 (PF00227)          | O     |
| YDL213C | 31 | 0.59 | 1    | PF00076                   | No          | 77   | 6 (PF00270 PF00271)   |       |
| YKL145W | 30 | 0.46 | 4    | PF00004                   | No          | 41   | 6 (PF00004)           | O     |
| YKL068W | 30 | 0.38 | 8    | PF04096                   | No          | 756  | 5 (PF03810)           | YU    |
| YPR110C | 28 | 0.45 | 3    | PF01000                   | No          | 2    | 3 (PF02786 PF00289 +) | K     |
| YCL059C | 28 | 0.76 | 3    | PF00013                   | No          | 36   | 9 (PF00400)           | JD    |
| YMR049C | 27 | 0.67 | 8    | PF00400                   | 5 (PF00400) | 151  | 4 (PF00270 PF00271)   | J     |
| YDL147W | 26 | 0.53 | 4    | PF01399                   | No          | 13   | 6 (PF00227 PF00004)   | O     |
| YDL029W | 26 | 0.40 | 1    | PF00022                   | No          | 10   | 4 (PF00069)           | Z     |
| YHR200W | 25 | 0.65 | 2    | PfamB/OP                  | No          | 34   | 10 (PF00227)          | O     |
| YGR119C | 25 | 0.36 | 4    | PfamB/OP                  | No          | 291  | 6 (PF03810)           | YU    |

|         |    |      |    |                                    |             |     |                       |    |
|---------|----|------|----|------------------------------------|-------------|-----|-----------------------|----|
| YLR293C | 23 | 0.51 | 1  | PF00071                            | No          | 51  | 5 (PF03810)           | U  |
| YBL007C | 23 | 0.40 | 11 | PF03983, PF00018                   | 3 (PF00018) | 470 | 5 (PF00018)           | X  |
| YER082C | 22 | 0.69 | 6  | PF00400                            | 2 (PF00400) | 98  | 8 (PF00400)           | A  |
| YPR016C | 22 | 0.52 | 1  | PF01912                            | No          | 5   | 3 (PF00270 PF00271 +) | J  |
| YGL048C | 22 | 0.44 | 5  | PF00004                            | No          | 46  | 4 (PF00004)           | O  |
| YNL110C | 21 | 0.77 | 1  | PF00076                            | No          | 92  | 3 (PF00270 PF00271)   | R  |
| YMR109W | 21 | 0.39 | 4  | PF00018, PF00063, PF06017          | No          | 154 | 6 (PF00018)           | Z  |
| YGR090W | 20 | 0.61 | 3  | PF03813                            | No          | 66  | 7 (PF00400)           | S  |
| YGR162W | 20 | 0.43 | 5  | PF02854                            | No          | 359 | 7 (PF00076)           | J  |
| YMR290C | 19 | 0.58 | 4  | PF00270, PF00271                   | No          | 39  | 4 (PF00076)           | A  |
| YGL011C | 19 | 0.48 | 1  | PF00227                            | No          | 16  | 10 (PF00227)          | O  |
| YLR074C | 19 | 0.63 | 1  | PF06220                            | No          | 18  | 2 (PF01926 PF00076)   | A  |
| YDL097C | 19 | 0.58 | 2  | PF01399                            | No          | 59  | 6 (PF00004)           | O  |
| YDR427W | 19 | 0.44 | 2  | PF01399                            | No          | 11  | 2 (PF00627 PF01399 +) | O  |
| YCR088W | 19 | 0.47 | 4  | PF00018, PF00241                   | No          | 408 | 4 (PF00018 PF00069)   | Z  |
| YKL129C | 19 | 0.40 | 4  | PF00018, PF00063, PF06017          | No          | 200 | 4 (PF00018)           | Z  |
| YJR121W | 18 | 0.54 | 3  | PF02874, PF00306, PF00006          | No          | 32  | 1 (PF04911)           | C  |
| YPR041W | 18 | 0.49 | 3  | PF01873, PF02020                   | No          | 74  | 2 (PF01399 PF02854)   | J  |
| YFR052W | 18 | 0.60 | 2  | PF04653                            | No          | 2   | 6 (PF00004)           | O  |
| YLR026C | 18 | 0.42 | 2  | PF00804, PF05739                   | No          | 147 | 4 (PF04810 PF00626 +) | U  |
| YOR116C | 18 | 0.43 | 5  | PF04998, PF04983, PF00623, PF04997 | No          | 30  | 2 (PF01096 PF02150)   | K  |
| YBL099W | 18 | 0.54 | 3  | PF02874, PF00306, PF00006          | No          | 15  | 1 (PF04911)           | C  |
| YDR060W | 17 | 0.69 | 7  | PF03914                            | No          | 102 | 3 (PF00270 PF00271 +) | JK |
| YER112W | 17 | 0.45 | 2  | PF01423                            | No          | 55  | 10 (PF01423)          | A  |
| YGR103W | 17 | 0.72 | 4  | PF06732, PF00533                   | No          | 78  | 3 (PF00076 PF00400)   | A  |
| YBR245C | 17 | 0.42 | 6  | PF00271, PF00176                   | No          | 71  | 3 (PF00176 PF00271)   | K  |
| YLR335W | 17 | 0.48 | 5  | PF00638                            | No          | 478 | 2 (PF00012 PF04096)   | YU |
| YLR078C | 17 | 0.59 | 1  | PF05008                            | No          | 48  | 2 (PF00025 PF04810 +) | U  |

|         |    |      |    |                                    |             |     |                       |     |
|---------|----|------|----|------------------------------------|-------------|-----|-----------------------|-----|
| YNL061W | 16 | 0.64 | 2  | PF01189                            | No          | 98  | 2 (PF01926 PF00076 +) | A   |
| YML092C | 16 | 0.40 | 1  | PF00227                            | No          | 5   | 8 (PF00227)           | O   |
| YNL132W | 16 | 0.57 | 9  | PF05127                            | No          | 35  | 4 (PF00400)           | R   |
| YLR175W | 16 | 0.61 | 3  | PF01509, PF01472                   | No          | 53  | 2 (PF00270 PF00271 +) | J   |
| YER146W | 16 | 0.43 | 1  | PF01423                            | No          | 9   | 9 (PF01423)           | A   |
| YMR116C | 16 | 0.56 | 7  | PF00400                            | 7 (PF00400) | 7   | 2 (PF00013)           | T   |
| YBR017C | 16 | 0.38 | 10 | PF02985                            | 5 (PF02985) | 14  | 3 (PF00153 PF02985)   | YU  |
| YHR107C | 16 | 0.37 | 1  | PF00735                            | No          | 61  | 4 (PF00735)           | DZU |
| YMR080C | 15 | 0.44 | 7  | PF00270                            | No          | 21  | 3 (PF00076)           | A   |
| YDR301W | 15 | 0.46 | 8  | PF03178                            | No          | 23  | 2 (PF00400)           | A   |
| YBR142W | 15 | 0.63 | 6  | PF00270, PF00271                   | No          | 125 | 2 (PF00270 PF00271 +) | A   |
| YPR165W | 15 | 0.40 | 1  | PF00071                            | No          | 22  | 3 (PF00620)           | R   |
| YOR117W | 15 | 0.48 | 3  | PF00004                            | No          | 61  | 3 (PF00004)           | O   |
| YDL208W | 15 | 0.53 | 1  | PF01248                            | No          | 36  | 3 (PF00400)           | A   |
| YOR259C | 15 | 0.45 | 4  | PF00004                            | No          | 49  | 4 (PF00004)           | O   |
| YDR280W | 14 | 0.51 | 2  | PF03725, PF01138                   | No          | 21  | 3 (PF01138 PF03725)   | J   |
| YHL030W | 14 | 0.38 | 19 | PF02985                            | 7 (PF02985) | 42  | 2 (PF01399 PF01398)   | S   |
| YOL021C | 14 | 0.58 | 5  | PF00773                            | No          | 38  | 6 (PF01138)           | J   |
| YOR261C | 14 | 0.52 | 2  | PF01398                            | No          | 45  | 4 (PF00227)           | O   |
| YPR181C | 14 | 0.45 | 5  | PF04810, PF04811, PF04815, PF00626 | No          | 22  | 3 (PF04810 PF00626 +) | U   |
| YBR143C | 14 | 0.40 | 3  | PF03465, PF03464, PF03463          | No          | 13  | 3 (PF02985)           | J   |
| YFR004W | 14 | 0.55 | 2  | PF01398                            | No          | 55  | 4 (PF00004)           | O   |
| YDR225W | 14 | 0.36 | 1  | PF00125                            | No          | 29  | 3 (PF00125)           | B   |
| YHR016C | 14 | 0.38 | 4  | PF00018, PF04366                   | No          | 169 | 3 (PF00018)           | S   |
| YHR166C | 14 | 0.77 | 9  | PF00515, PF04049                   | 6 (PF00515) | 28  | 2 (PF07719 PF00515)   | DO  |
| YNL287W | 14 | 0.42 | 4  | PF01602                            | No          | 78  | 2 (PF04053 PF00400)   | U   |
| YKL018W | 14 | 0.54 | 5  | PF00400                            | No          | 1   | 3 (PF00400)           | ABO |
| YLR208W | 14 | 0.42 | 6  | PF00400                            | 6 (PF00400) | 5   | 3 (PF00400)           | U   |

|         |    |      |    |                                    |             |     |                       |    |
|---------|----|------|----|------------------------------------|-------------|-----|-----------------------|----|
| YBR010W | 13 | 0.44 | 1  | PF00125                            | No          | 46  | 3 (PF00125 PF00069)   | B  |
| YFR050C | 13 | 0.52 | 1  | PF00227                            | No          | 23  | 4 (PF00227)           | O  |
| YIL021W | 13 | 0.40 | 2  | PF01000                            | No          | 54  | 2 (PF01193)           | K  |
| YJL002C | 13 | 0.64 | 1  | PF04597                            | No          | 23  | 3 (PF00400)           | O  |
| YLR262C | 13 | 0.38 | 1  | PF00071                            | No          | 41  | 1 (PF02414)           | S  |
| YNL094W | 13 | 0.45 | 3  | PfamB/OP                           | No          | 57  | 6 (PF00018)           | X  |
| YDR097C | 13 | 0.44 | 5  | PF00488, PF05188, PF01624, PF05192 | No          | 309 | 2 (PF01624 PF01336 +) | L  |
| YBL038W | 13 | 0.39 | 1  | PF00252                            | No          | 15  | 2 (PF00169)           | J  |
| YOR341W | 12 | 0.59 | 5  | PF04998, PF04983, PF00623, PF04997 | No          | 90  | 1 (PF01193)           | K  |
| YKL022C | 12 | 0.82 | 11 | PF00515, PF07719                   | 6 (PF00515) | 39  | 2 (PF00515 PF00400)   | DO |
| YOR362C | 12 | 0.40 | 1  | PF00227                            | No          | 46  | 4 (PF00227)           | O  |
| YDR103W | 12 | 0.47 | 8  | PF00097                            | No          | 62  | 3 (PF00069)           | X  |
| YDL014W | 12 | 0.60 | 1  | PF01269                            | No          | 50  | 2 (PF00076 PF01798)   | A  |
| YJL074C | 12 | 0.59 | 9  | PF06470, PF02483, PF02463          | No          | 86  | 3 (PF06470 PF02463 +) | D  |
| YMR314W | 12 | 0.59 | 1  | PF00227                            | No          | 15  | 4 (PF00227)           | O  |
| YGR245C | 12 | 0.75 | 3  | PF05285                            | No          | 102 | 3 (PF01926)           | DZ |
| YER006W | 12 | 0.68 | 4  | PF01926                            | No          | 57  | 3 (PF00076)           | R  |
| YER126C | 12 | 0.85 | 1  | PF01201                            | No          | 35  | 2 (PF01926 PF00400)   | R  |
| YDL007W | 12 | 0.63 | 5  | PF00004                            | No          | 44  | 2 (PF01399 PF00004)   | O  |
| YLR127C | 12 | 0.63 | 6  | PF00888                            | No          | 38  | 3 (PF00515)           | DO |
| YLR277C | 12 | 0.57 | 5  | PF07521, PF00753                   | No          | 28  | 2 (PF00400)           | A  |
| YBR088C | 12 | 0.44 | 2  | PF00705, PF02747                   | No          | 13  | 5 (PF00004)           | L  |
| YHR089C | 12 | 0.62 | 1  | PF04410                            | No          | 84  | 2 (PF00076)           | J  |
| YJL109C | 12 | 0.66 | 6  | PfamB/OP                           | No          | 30  | 4 (PF00400)           | S  |
| YOR270C | 11 | 0.60 | 1  | PF01496                            | No          | 50  | 2 (PF02874 PF00306)   | C  |
| YDR101C | 11 | 0.61 | 3  | PF00557                            | No          | 24  | 1 (PF05285)           | R  |
| YAR002W | 11 | 0.47 | 1  | PfamB/OP                           | No          | 147 | 2 (PF00012 PF02985 +) | Y  |
| YFR002W | 11 | 0.38 | 3  | PF04097                            | No          | 39  | 1 (PF07926)           | D  |

|         |    |      |    |                                    |             |     |                       |     |
|---------|----|------|----|------------------------------------|-------------|-----|-----------------------|-----|
| YHR052W | 11 | 0.71 | 1  | PfamB/OP                           | No          | 35  | 3 (PF00076 PF00400)   | S   |
| YOR272W | 11 | 0.63 | 6  | PF00400                            | 6 (PF00400) | 5   | 3 (PF00076)           | Z   |
| YNR003C | 11 | 0.63 | 1  | PF05158                            | No          | 20  | 1 (PF00382)           | K   |
| YNR053C | 11 | 0.49 | 3  | PF01926                            | No          | 27  | 2 (PF01423)           | R   |
| YBR084W | 11 | 0.60 | 3  | PF02882, PF00763, PF01268          | No          | 13  | 1 (PF05672)           | H   |
| YLR384C | 11 | 0.40 | 3  | PF04762                            | No          | 53  | 1 (PF04055)           | K   |
| YDL065C | 11 | 0.43 | 1  | PF04614                            | No          | 62  | 3 (PF04757)           | U   |
| YDR496C | 11 | 0.55 | 7  | PF00806                            | 4 (PF00806) | 53  | 2 (PF00076)           | J   |
| YJR076C | 11 | 0.47 | 2  | PF00735                            | No          | 92  | 5 (PF00735)           | DZU |
| YLR196W | 11 | 0.40 | 7  | PF00400                            | 3 (PF00400) | 31  | 5 (PF00118)           | S   |
| YNL016W | 11 | 0.39 | 4  | PF00076                            | 3 (PF00076) | 77  | 5 (PF00076)           | R   |
| YER157W | 11 | 0.49 | 3  | PF04136                            | No          | 33  | 2 (PF00957)           | U   |
| YMR197C | 11 | 0.47 | 1  | PF05008                            | No          | 29  | 6 (PF05739)           | U   |
| YOL139C | 11 | 0.55 | 1  | PF01652                            | No          | 32  | 4 (PF00076)           | J   |
| YBL050W | 10 | 0.45 | 5  | PF02071                            | 3 (PF02071) | 14  | 6 (PF05739)           | U   |
| YGR120C | 10 | 0.44 | 1  | PfamB/OP                           | No          | 10  | 1 (PF06419)           |     |
| YPR010C | 10 | 0.45 | 10 | PF06883, PF00562, PF04561, PF04567 | No          | 16  | 1 (PF02260)           | K   |
| YLL011W | 10 | 0.63 | 7  | PF04158, PF00400                   | 6 (PF00400) | 54  | 5 (PF00118)           | A   |
| YOL041C | 10 | 0.50 | 4  | PF00076                            | No          | 110 | 2 (PF00270 PF00271 +) | R   |
| YOR151C | 10 | 0.48 | 8  | PF04566, PF00562, PF04561, PF04567 | No          | 16  | 1 (PF05000)           | K   |
| YNL172W | 10 | 0.76 | 8  | PfamB/OP                           | No          | 53  | 3 (PF00515)           | DO  |
| YPL012W | 10 | 0.73 | 4  | PfamB/OP                           | No          | 71  | 3 (PF00076)           | S   |
| YAR003W | 10 | 0.57 | 7  | PF00400                            | 4 (PF00400) | 23  | 2 (PF00400)           | R   |
| YJL033W | 10 | 0.56 | 6  | PF00270, PF00271                   | No          | 157 | 3 (PF00076)           | A   |
| YJR063W | 10 | 0.50 | 2  | PF02150, PF01096                   | No          | 11  | 1 (PF00177)           | K   |
| YBL084C | 10 | 0.86 | 8  | PF07719, PF00515, PF05462          | 6 (PF07719) | 149 | 2 (PF00515)           | D   |
| YBL004W | 10 | 0.75 | 11 | PF07539                            | No          | 37  | 3 (PF00076)           | V   |
| YDL134C | 10 | 0.47 | 2  | PF00149                            | No          | 63  | 2 (PF00069)           | T   |



|         |    |      |    |                                    |              |     |                       |     |
|---------|----|------|----|------------------------------------|--------------|-----|-----------------------|-----|
| YLR314C | 10 | 0.50 | 3  | PF00735                            | No           | 99  | 4 (PF00735)           | DZU |
| YOL094C | 10 | 0.54 | 2  | PF00004                            | No           | 4   | 5 (PF00004)           | L   |
| YOL145C | 10 | 0.49 | 15 | PF07719, PF00515                   | 4 (PF00515)  | 100 | 1 (PF05000)           | P   |
| YGR156W | 10 | 0.44 | 3  | PF00076                            | No           | 64  | 1 (PF03178)           | A   |
| YLL036C | 10 | 0.32 | 5  | PfamB/OP                           | No           | 17  | 1 (PF06246)           | R   |
| YBR087W | 10 | 0.66 | 2  | PF00004                            | No           | 19  | 5 (PF00004)           | DL  |
| YDL008W | 10 | 0.88 | 1  | PF00097                            | No           | 33  | 3 (PF00515)           | DO  |
| YJR068W | 10 | 0.54 | 2  | PF00004                            | No           | 26  | 4 (PF00004)           | L   |
| YHR069C | 10 | 0.47 | 3  | PfamB/OP                           | No           | 27  | 4 (PF01138 PF03725)   | A   |
| YIL109C | 10 | 0.45 | 8  | PF04810, PF04811, PF04815, PF00626 | No           | 193 | 2 (PF05739)           | U   |
| YJL069C | 10 | 0.83 | 5  | PF00400                            | 3 (PF00400)  | 126 | 5 (PF00400)           | R   |
| YOR249C | 10 | 0.86 | 5  | PfamB/OP                           | No           | 18  | 3 (PF00515)           |     |
| YLR291C | 9  | 0.66 | 1  | PF01008                            | No           | 12  | 2 (PF01008)           | J   |
| YLR222C | 9  | 0.44 | 13 | PF00400                            | 10 (PF00400) | 1   | 4 (PF00400)           | A   |
| YLR212C | 9  | 0.41 | 2  | PF00091, PF03953                   | No           | 22  | 2 (PF01920 PF02996 +) | Z   |
| YNL002C | 9  | 0.76 | 3  | PF00327                            | No           | 39  | 2 (PF00076)           | J   |
| YNL102W | 9  | 0.47 | 7  | PF03104, PF00136                   | No           | 166 | 1 (PF04857)           | L   |
| YPL213W | 9  | 0.40 | 1  | PfamB/OP                           | No           | 50  | 4 (PF01423)           | A   |
| YPR103W | 9  | 0.66 | 1  | PF00227                            | No           | 17  | 5 (PF00227)           | O   |
| YDR224C | 9  | 0.37 | 1  | PF00125                            | No           | 42  | 3 (PF00125)           | B   |
| YDR244W | 9  | 0.36 | 7  | PF00515                            | 4 (PF00515)  | 210 | 1 (PF00018)           | R   |
| YER094C | 9  | 0.46 | 1  | PF00227                            | No           | 2   | 5 (PF00227)           | O   |
| YGL004C | 9  | 0.64 | 4  | PF00400                            | 2 (PF00400)  | 2   | 5 (PF00004)           | R   |
| YOR224C | 9  | 0.59 | 1  | PF03870                            | No           | 1   | 3 (PF05000 PF04997 +) | K   |
| YDL195W | 9  | 0.57 | 13 | PF00400                            | 5 (PF00400)  | 501 | 2 (PF04810 PF00626 +) | U   |
| YGR195W | 9  | 0.57 | 2  | PF03725, PF01138                   | No           | 23  | 2 (PF01138 PF03725)   | J   |
| YIL115C | 9  | 0.39 | 9  | PfamB/OP                           | No           | 780 | 4 (PF03810)           | YU  |
| YJR045C | 9  | 0.36 | 1  | PF00012                            | No           | 44  | 2 (PF02466)           | O   |

|         |   |      |   |                           |    |     |                       |     |
|---------|---|------|---|---------------------------|----|-----|-----------------------|-----|
| YJR065C | 9 | 0.64 | 1 | PF00022                   | No | 20  | 2 (PF00018)           | Z   |
| YER136W | 9 | 0.36 | 1 | PF00996                   | No | 23  | 9 (PF00071)           | O   |
| YFR036W | 9 | 0.77 | 1 | PfamB/OP                  | No | 21  | 3 (PF00515)           |     |
| YOR036W | 9 | 0.36 | 2 | PF05739                   | No | 109 | 1 (PF02071)           | U   |
| YJL157C | 9 | 0.39 | 8 | PF00097                   | No | 35  | 3 (PF00134)           | X   |
| YLR197W | 9 | 0.78 | 4 | PF01798                   | No | 33  | 3 (PF00400)           | AJ  |
| YPR187W | 9 | 0.56 | 1 | PF01192                   | No | 17  | 3 (PF05000 PF04997 +) | K   |
| YDR118W | 9 | 0.85 | 6 | PfamB/OP                  | No | 17  | 2 (PF00515)           | DO  |
| YFL008W | 9 | 0.52 | 8 | PF06470, PF02483, PF02463 | No | 99  | 2 (PF06470 PF02463 +) | D   |
| YNL118C | 9 | 0.43 | 7 | PF00293, PF05026          | No | 61  | 3 (PF01423)           | A   |
| YPR088C | 9 | 0.43 | 4 | PF02978, PF02881, PF00448 | No | 68  | 2 (PF05383)           | U   |
| YER009W | 9 | 0.40 | 1 | PF02136                   | No | 1   | 3 (B005278)           | U   |
| YKL059C | 9 | 0.41 | 4 | PF04564, PF00098          | No | 39  | 2 (PF00400)           | O   |
| YGL070C | 8 | 0.39 | 2 | PF02150, PF01096          | No | 12  | 2 (PF05000 PF04997 +) | K   |
| YGL200C | 8 | 0.71 | 1 | PF01105                   | No | 0   | 2 (PF04810 PF00626 +) | U   |
| YGR020C | 8 | 0.41 | 1 | PF01990                   | No | 7   | 2 (PF01496)           | C   |
| YJR060W | 8 | 0.45 | 3 | PF00010                   | No | 136 | 2 (PF07716)           | K   |
| YNL290W | 8 | 0.49 | 2 | PF00004                   | No | 16  | 4 (PF00004)           | L   |
| YOR250C | 8 | 0.42 | 2 | PF06807                   | No | 15  | 1 (PF03178)           | A   |
| YOR260W | 8 | 0.82 | 5 | PfamB/OP                  | No | 25  | 3 (PF01008)           | J   |
| YBL041W | 8 | 0.59 | 1 | PF00227                   | No | 7   | 1 (PF00096)           | O   |
| YBR102C | 8 | 0.38 | 5 | PfamB/OP                  | No | 51  | 1 (PF02845)           | U   |
| YCR002C | 8 | 0.57 | 1 | PF00735                   | No | 27  | 4 (PF00735)           | DTZ |
| YEL002C | 8 | 0.67 | 1 | PF03345                   | No | 17  | 1 (PF02109)           | O   |
| YGL153W | 8 | 0.67 | 2 | PF04695                   | No | 84  | 1 (PF00018)           | MOU |
| YLR113W | 8 | 0.42 | 2 | PF00069                   | No | 24  | 4 (PF00069)           | T   |
| YNL113W | 8 | 0.55 | 1 | PF01193                   | No | 46  | 2 (PF05000 PF01000 +) | K   |
| YPL093W | 8 | 0.66 | 3 | PF06858                   | No | 125 | 2 (PF00076)           | R   |

|         |   |      |    |                           |             |     |                       |     |
|---------|---|------|----|---------------------------|-------------|-----|-----------------------|-----|
| YBR154C | 8 | 0.43 | 2  | PF03871, PF01191          | No          | 18  | 3 (PF05000 PF04997 +) | K   |
| YDR264C | 8 | 0.44 | 8  | PF00023, PF01529          | 4 (PF00023) | 24  | 2 (PF00069)           | R   |
| YDL225W | 8 | 0.49 | 3  | PF00735                   | No          | 121 | 4 (PF00735)           | DZU |
| YDR395W | 8 | 0.43 | 5  | PF03810                   | No          | 17  | 2 (PF04096)           | YU  |
| YGR135W | 8 | 0.46 | 1  | PF00227                   | No          | 16  | 3 (PF00227)           | O   |
| YKL085W | 8 | 0.59 | 2  | PF02866, PF00056          | No          | 18  | 3 (PF00069)           | C   |
| YDR356W | 8 | 0.41 | 5  | PF00261, PF00038          | No          | 70  | 2 (PF04130 PF00036)   |     |
| YBR127C | 8 | 0.35 | 3  | PF02874, PF00306, PF00006 | No          | 24  | 2 (PF01496)           | C   |
| YHR077C | 8 | 0.63 | 5  | PF02854, PF04050          | 3 (PF02854) | 46  | 1 (PF00009)           | A   |
| YOR157C | 8 | 0.36 | 1  | PF00227                   | No          | 18  | 3 (PF00227)           | O   |
| YBR118W | 8 | 0.56 | 3  | PF03143, PF03144, PF00009 | No          | 19  | 2 (PF00043 PF02798 +) | J   |
| YNL138W | 8 | 0.54 | 1  | PF01213                   | No          | 46  | 2 (PF00018)           | ZT  |
| YPR108W | 8 | 0.66 | 4  | PF07719, PF01399          | No          | 11  | 3 (PF01399)           | O   |
| YER179W | 8 | 0.45 | 1  | PF00154                   | No          | 22  | 2 (PF00071 PF00176 +) | DL  |
| YFL059W | 8 | 0.40 | 1  | PF01680                   | No          | 3   | 3 (PF01174)           | H   |
| YHR119W | 8 | 0.49 | 9  | PF00856, PF00076          | No          | 168 | 3 (PF00400)           | BK  |
| YLR409C | 8 | 0.56 | 11 | PF04192, PF00400          | 7 (PF00400) | 14  | 4 (PF00400)           | R   |
