# Supplementary material for: What properties characterize the hub proteins of the protein-protein interaction network of Saccharomyces cerevisiae?
Source: Springer Nature journal article supplement (doi:10.1186/gb-2006-7-6-r45), 2006-06-16
Supplement: 13059_2006_1313_MOESM10_ESM.pdf [file 13059_2006_1313_MOESM10_ESM.pdf]

**(a)**

Low connectivity protein PGM1

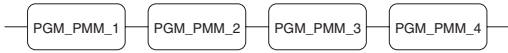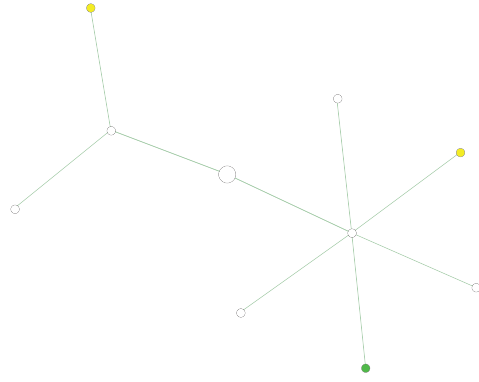

**(b)**

Party hub CDC16

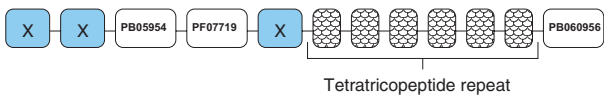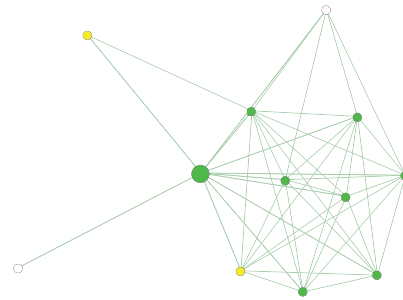

**(c)**

Date hub NUP1

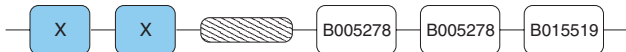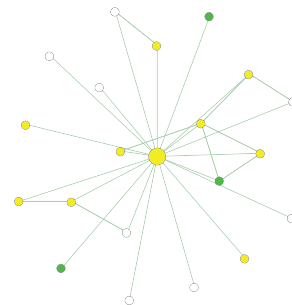

Figure 8
